# Supplementary material
Source: PubMed Central journal article supplement (PMC6600983)
Supplement: pnas.1901919116.sapp.pdf [file pnas.1901919116.sapp.pdf]

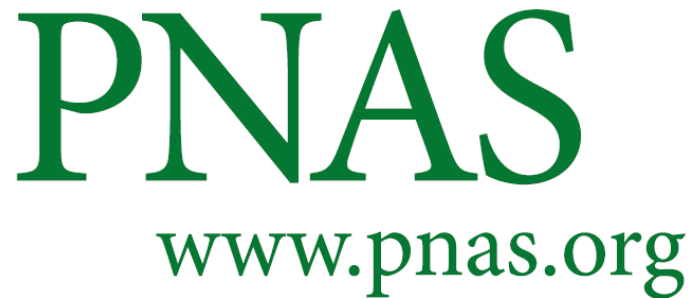

## Supplementary Information for

### **BMP controls dorsoventral and neural patterning in indirect developing hemichordates providing insight into a possible origin of chordates**

Yi-Hsien Su<sup>a,1</sup>, Yi-Chih Chen<sup>a</sup>, Hsiu-Chi Ting<sup>a</sup>, Tzu-Pei Fan<sup>a</sup>, Ching-Yi Lin<sup>a</sup>, Kuang-Tse Wang<sup>a</sup>, Jr-Kai Yu<sup>a,b,1</sup>

<sup>a</sup>Institute of Cellular and Organismic Biology, Academia Sinica, Taipei 11529, Taiwan

<sup>b</sup>Marine Research Station, Institute of Cellular and Organismic Biology, Academia Sinica, Yilan 26242, Taiwan

<sup>1</sup>Correspondence: yhsu@gate.sinica.edu.tw; jkyu@gate.sinica.edu.tw

#### **This PDF file includes:**

Supplementary text  
Figs. S1 to S8  
Tables S1 to S2  
References for SI reference citations

## Supplementary Materials and Methods

### Phylogenetic analysis

Complete protein sequences were aligned using ClustalW with default settings on MEGA ver. 6.06. The alignments were analyzed using Bayesian inference analysis (MrBayes ver. 3.2.6, CIPRES Science Gateway). The Markov chain Monte Carlo analyses were specified at 100,000 or 1,000,000 generations, and the other parameters were defaults. FigTree ver. 1.4.3 was used to illustrate the trees. GenBank accession numbers of the genes used for the phylogenetic analyses are listed in Table S2.

### Larval culture and feeding experiments

*P. flava* and *S. purpuratus* larvae were cultured in 200 ml of filtered seawater with constant gentle stirring. The culture medium was replaced every other day with fresh filtered seawater containing *Rhodomonas* (1). Equal amount of *Rhodomonas* were added into control and mBMP4-treated samples.

### *In situ* hybridization of the amphioxus *onecut*

The amphioxus *onecut* was cloned by RACE PCR with two nested forward primers (forward primer F743: 5'-AACGTTCAACGGTTATGCCAACCACC-3'; forward primer F1308: 5'-AAGCGGAAAGAACAAGAAGCTGCG-3') and the 3' RACE primer provided in the FirstChoice RLM-RACE Kit (Thermo Fisher Scientific). *B. floridae* adults and embryos were cultured at room temperature and *in situ* hybridization was performed as described (2).

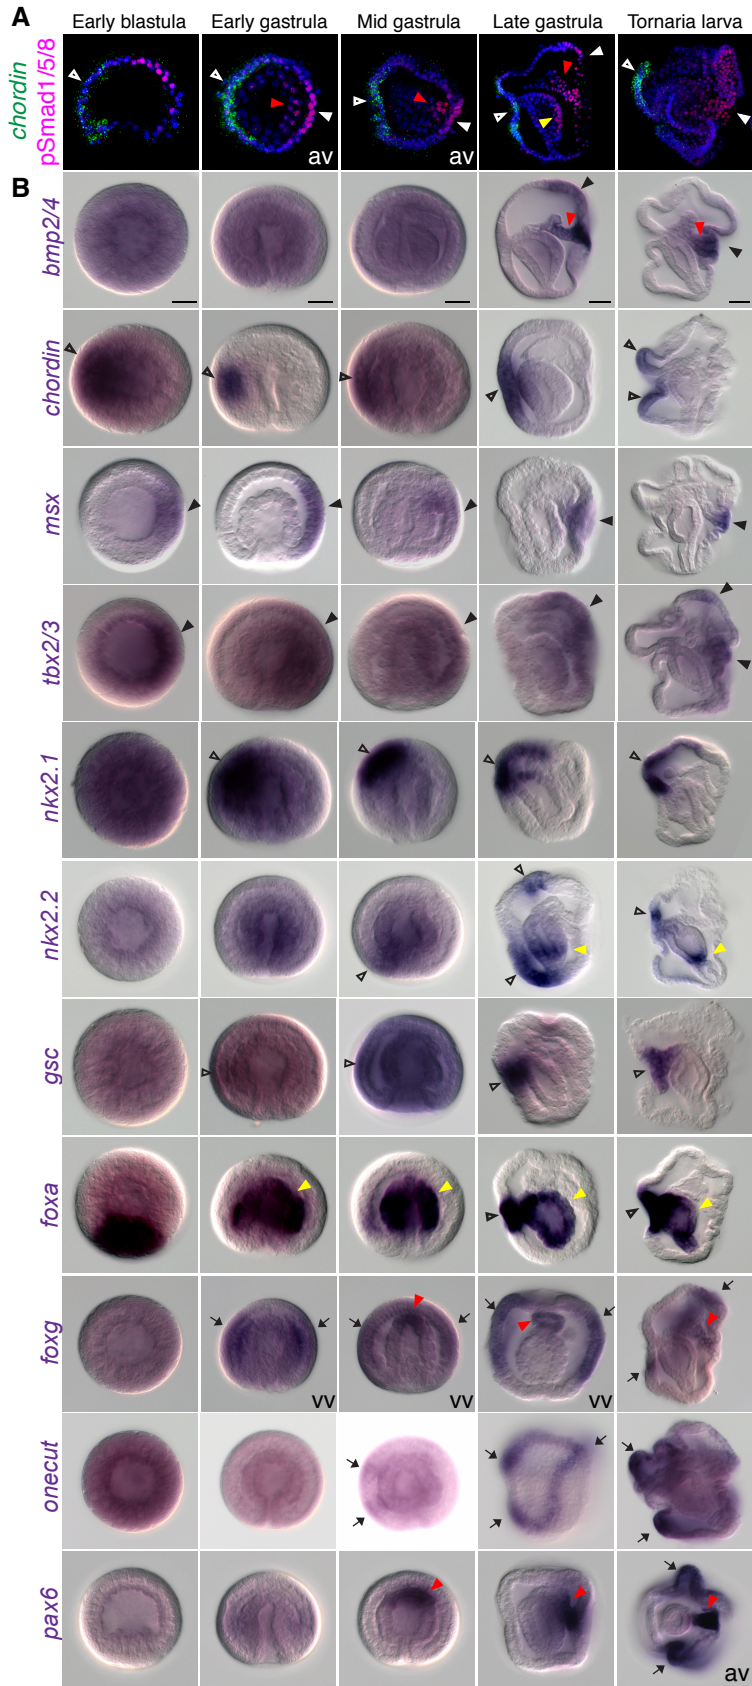

**Fig. S1.** Ectodermal gene expression patterns throughout embryogenesis of *P. flava*. **(A)** Double staining of *chordin* fluorescent *in situ* hybridization and immunostaining with an anti-pSmad1/5/8 antibody at various embryonic stages. **(B)** *In situ* hybridization of genes investigated in this study. Specific expression of *bmp2/4* on the dorsal side was initiated at the late gastrula stage. Expression of *chordin* in the presumptive ventral ectoderm at the blastula stage possibly acts on ubiquitously distributed, maternal BMP ligands. Genes encoding Msx and Tbx2/3 transcription factors were expressed in the presumptive dorsal ectoderm, beginning at the blastula stage. Genes that showed specific expression in subdomains of the ventral ectoderm during gastrulation include *nkx2.1* and *nkx2.2* (near the animal and vegetal poles, respectively), and *gsc* and *foxa* (in the stomodeal region). The *foxg*, *onecut*, and *pax6* genes were expressed in the lateral ectoderm, which marks the positions of future ciliary bands between the dorsal and ventral ectoderm. Except *pax6*, orthologs of these genes exhibit similar expression patterns in sea urchin embryos (3, 4), suggesting that the patterning mechanism and the deployment of the transcription factors for establishing the larval DV axis, including the ciliary band between the dorsal and ventral ectoderm, was present in the ambulacrarian ancestor. Scale bar is 30  $\mu$ m. Empty arrowheads, black arrowheads, and arrows indicate the expression in the ventral ectoderm, dorsal ectoderm, and lateral ectoderm, respectively. Red and yellow arrowheads indicate the mesodermal and endodermal expression patterns, respectively. All images are side views unless otherwise indicated; av, apical view; vv, ventral view.

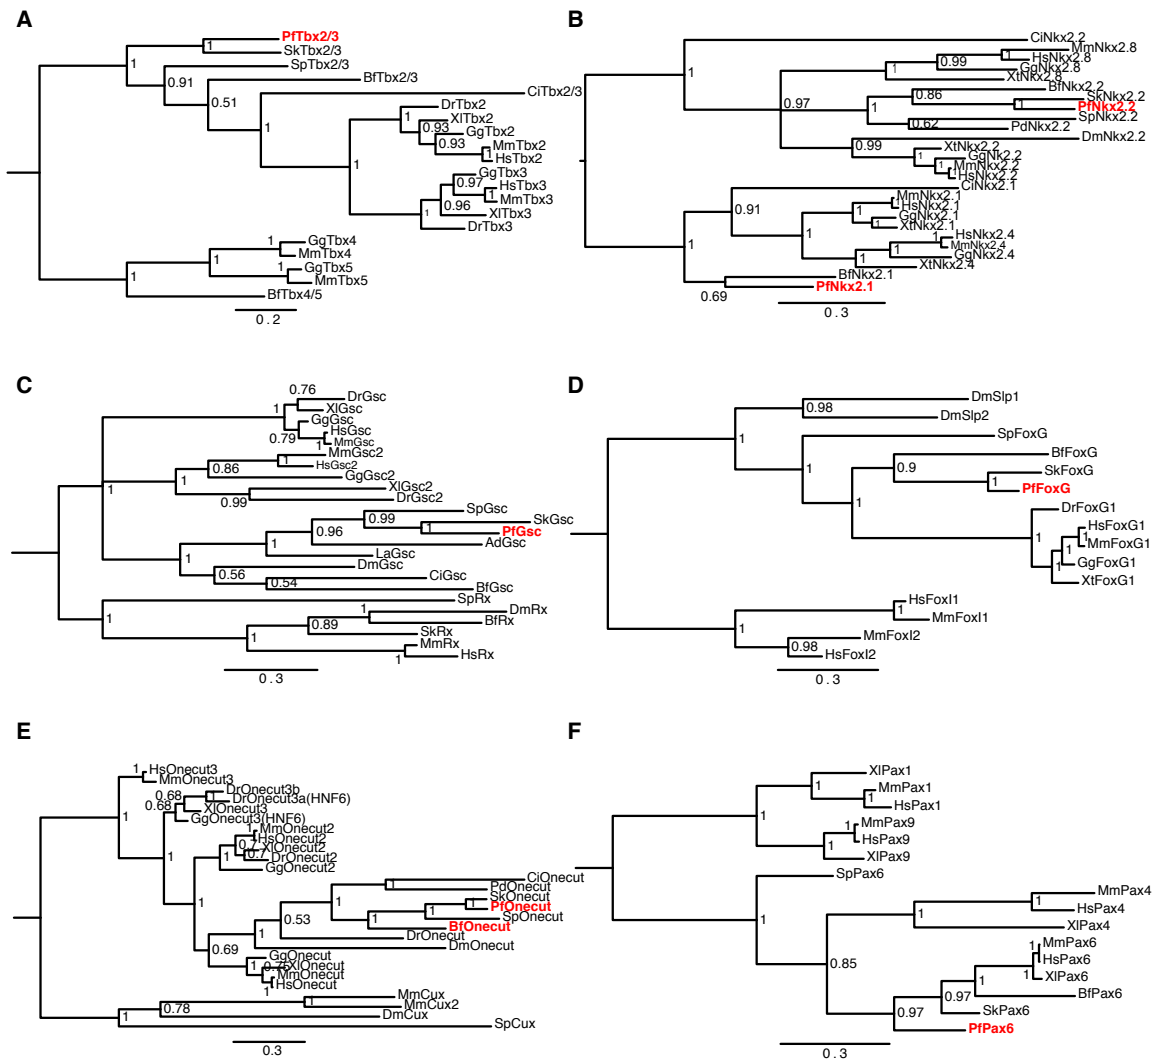

**Fig. S2.** Phylogenetic analyses of genes identified in this study. Complete protein sequences of (A) Tbx2/3, (B) Nkx2.2, (C) Gsc, (D) FoxG, (E) Onecut, and (F) Pax6 from various species were aligned and analyzed using Bayesian inference analysis. The Markov chain Monte Carlo analysis was set to run for 100,000 (a,c,f) or 1,000,000 (b,d,e) generations. The outgroup sequences used in the analyses were (A) Tbx4/5, (B) Nkx2.1/Nkx2.4, (C) Rx, (D) FoxI, (E) Cux, and (F) Pax1/Pax9. The nodes indicate the posterior possibilities, and the scale bars are changes per site. GenBank accession numbers of the analyzed protein sequences are given in Table S2.

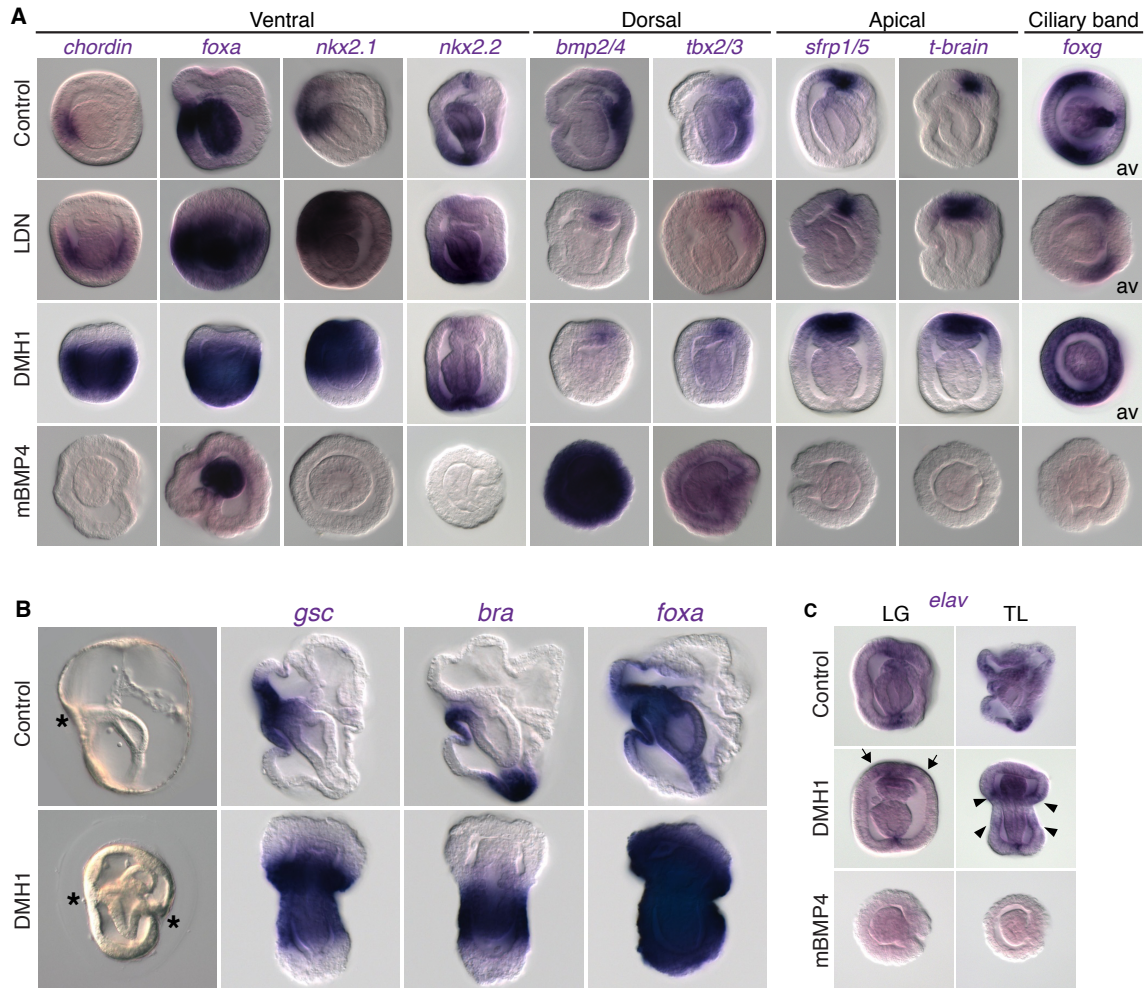

**Fig. S3.** BMP signaling controls DV patterning in *P. flava*. **(A)** Expression of ventral, dorsal, apical, and ciliary band marker genes in control gastrulae and embryos treated with 2  $\mu$ M LDN, 2  $\mu$ M DMH1, or 125 ng/ml mBMP4 after fertilization. **(B)** Expression of the stomodeal marker genes in control tornaria larvae and larvae treated with 2  $\mu$ M DMH1. Asterisks indicate mouth openings. **(C)** Expression of *elav* was detected in several domains, including the apical region, the ciliary band, cells around the blastopore, and some mesodermal cells. In DMH1-treated embryos, *elav* expression in the apical region (arrows) and ciliary band expanded (arrowheads). Exogenous mBMP4 abolished its expression. All images are side views unless otherwise indicated. av, apical view. The data presented represent the phenotypes of most samples (>95%).

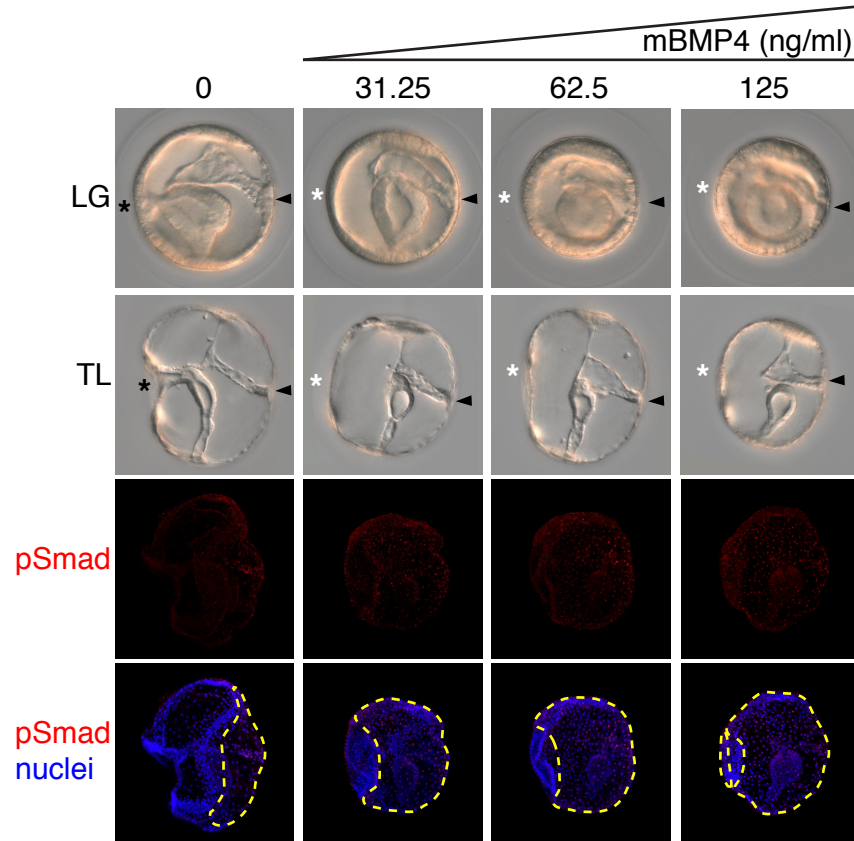

**Fig. S4.** To vary the level of the BMP signaling, embryos were treated with different concentrations of mBMP4 for 4 hrs during early gastrulation (from 24 to 28 hrs post fertilization). The phenotypes were observed at the late gastrula (LG) and the tornaria larval (TL) stages. To examine regions that receive BMP signaling, the TL-stage samples were stained with an anti-phospho-Smad1/5/8 (pSmad) antibody. When mBMP4 concentrations were increased, the pSmad-positive regions expanded (yellow dashed regions), while the pSmad-negative regions became smaller. The black asterisks and arrowheads indicate the mouth and the hydropore openings, respectively. The white asterisks denote the disappearance of the mouth. All images are side views (ventral to the left). The data presented represent the phenotypes of most samples (>95%).

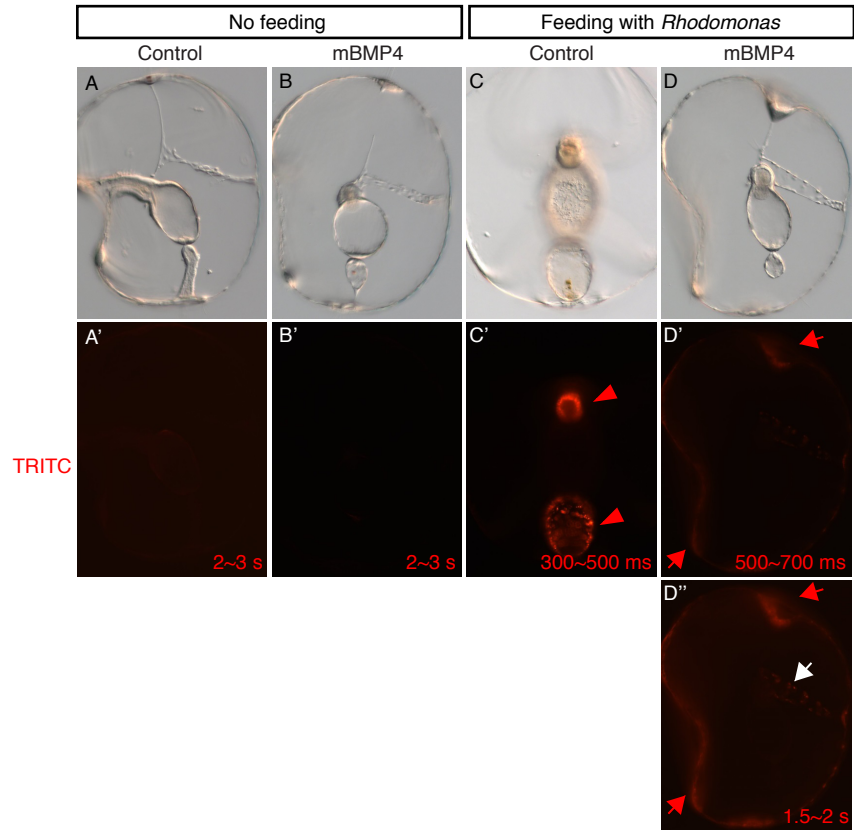

**Fig. S5.** Feeding experiments for control and mouthless tornaria larvae. (A-B) Eight-day-old control tornaria and mouthless larvae (mBMP4 treatment from 24 to 28 hpf) cultured in filtered seawater without feeding. (C-D) Eight-day-old control and mouthless larvae (mBMP4) fed with *Rhodomonas* (feeding started from 3 dpf). A TRITC filter was used to detect fluorescent signals emitted from *Rhodomonas*. The exposure time for the fluorescent images is indicated at the bottom-right corner. The arrowheads (C') denote the presence of *Rhodomonas* in the digestive tract. The red and white arrows (D' and D'') indicate fluorescent signals in the ectoderm and mesoderm, respectively. Fluorescent signals were not detected in the mouthless larva without feeding (B'), suggesting that the mouthless larva may be able to take-up *Rhodomonas* or its debris from seawater. (A), (B), and (D) are side views (ventral to the left) and (C) is viewed from the ventral side.



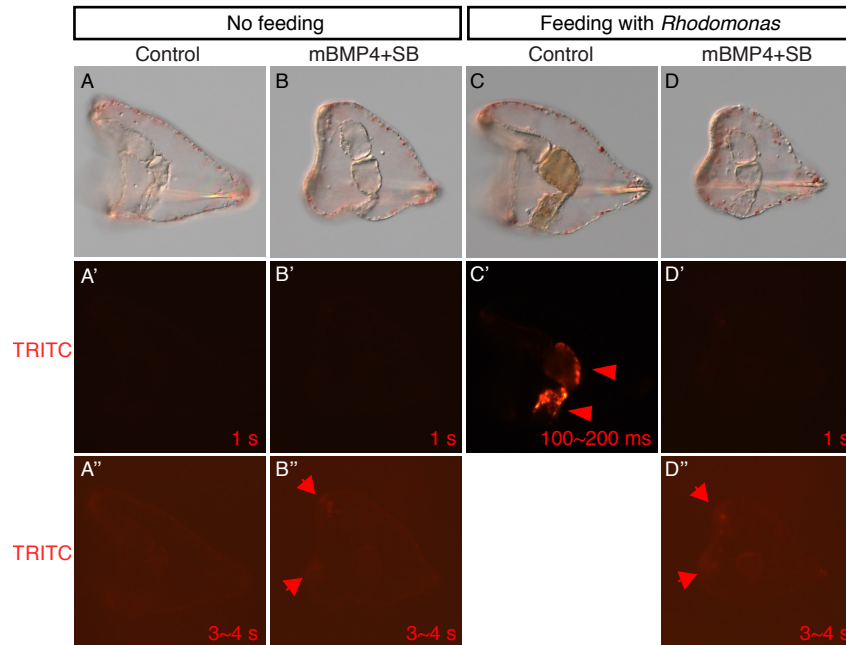

**Fig. S6.** Feeding experiments for control and mouthless sea urchin pluteus larvae. **(A-B)** Seven-day-old control and mouthless sea urchin larvae (mBMP4+SB treatment from 24 to 28 hpf) cultured in filtered seawater without feeding. **(C-D)** Seven-day-old control and mouthless larvae (mBMP4+SB) fed with *Rhodomonas* (feeding started from 3 dpf). A TRITC filter was used to detect *Rhodomonas*. The exposure time for the fluorescent images is indicated at the bottom-right corner. The arrowheads (**C'**) denote the presence of *Rhodomonas* in the digestive tract. The red arrows (**B''** and **D''**) indicate fluorescent signals in some mesodermal cells. The mesodermal fluorescent signals were detected in the mouthless larvae regardless of feeding, demonstrating that the fluorescence was not due to the presence of algae. All images are side views (ventral to the left).

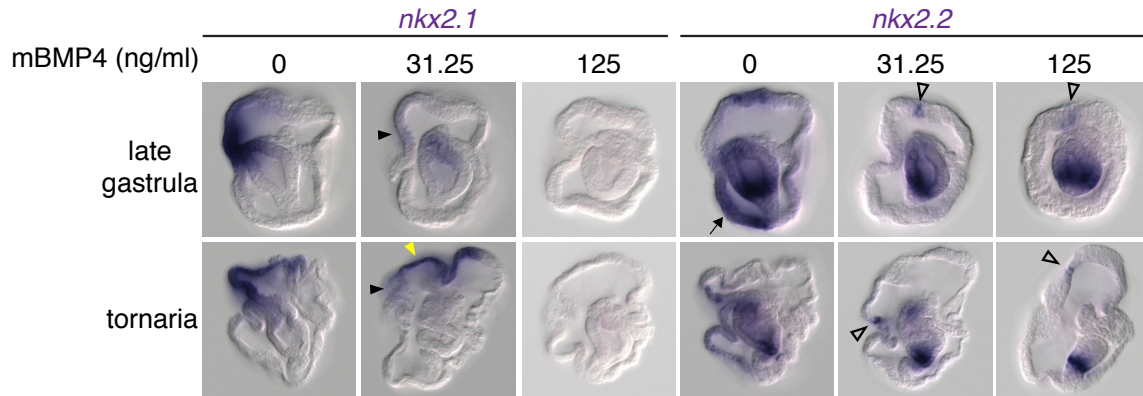

**Fig. S7.** Transient over-activation of BMP signals affects ectodermal expression of *nkx2.1* and *nkx2.2*. *In situ* hybridization of *nkx2.1* and *nkx2.2* was performed in control and mBMP4-treated (treatment from 24 to 28 hpf) *P. flava* embryos. At the late gastrula stage, the anterior-ventral ectodermal expression of *nkx2.1* (arrowhead) was decreased at a lower concentration of mBMP4 (31.25 ng/ml) and completely disappeared at a high level of mBMP4 (125 ng/ml). Its anterior ectodermal expression was detected at the tornaria stage (yellow arrowhead). Upon treatment, the posterior-ventral ectodermal expression of *nkx2.2* (arrow) disappeared, and only a few *nkx2.2*-positive cells remained in the ventral ectoderm (empty arrowheads). All images are side views (ventral to the left).

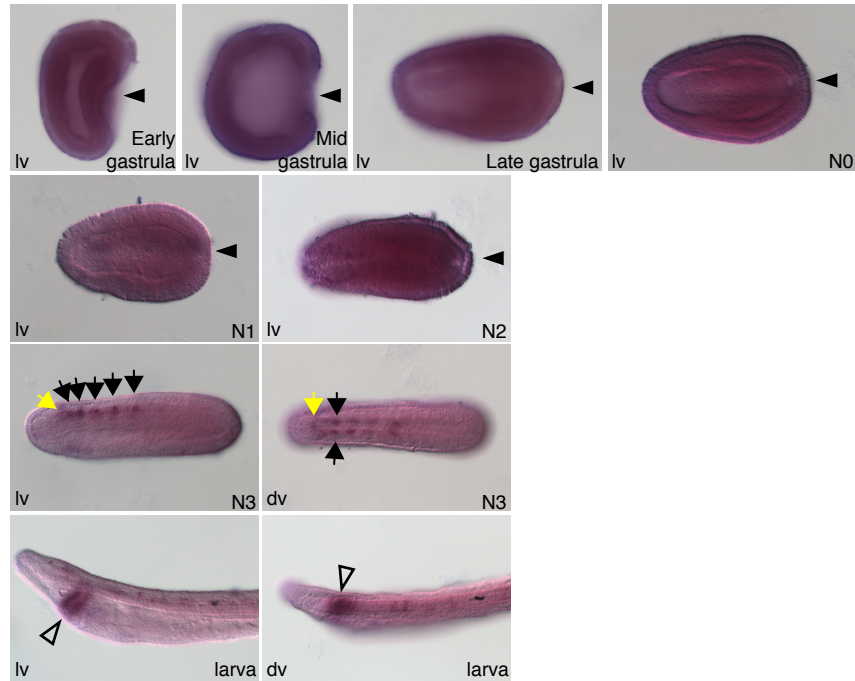

**Fig. S8.** Expression of the amphioxus *onecut* gene during embryogenesis. The *Branchiostoma floridae* homolog of *onecut* was cloned (Fig. S2) and *in situ* hybridization was performed at various developmental stages, beginning from early and mid-gastrula, extending to different neurula (N0-N3) stages, and finally to the larval stage. Developmental stages are indicated at the bottom-right corner. Views of the samples are indicated at the bottom-left corner (lv, lateral view; dv, dorsal view). Anterior is to the left and the arrowheads indicate the blastopores. No specific expression is detected before the N2 stage. At the N3 stage, *onecut* transcript is detected in the posterior part of the cerebral vesicle (yellow arrow) and in five pairs of neurons in the neural tube (black arrows; only one pair of neurons is indicated in the dorsal-view N3 embryo). At the larval stage (only the anterior part of the larva is shown), strong expression in the endostyle (empty arrowheads) is observed.

**Table S1. Primers used for cloning *P. flava* genes**

| <b>Gene Name</b>      | <b>primer direction</b> | <b>Sequence</b>              |
|-----------------------|-------------------------|------------------------------|
| <i>Gooseoid (gsc)</i> | F                       | TCACGTCGCGTCACGTCAAAGTCAC    |
|                       | R                       | CCCAACATTCGAGCAATCGTTCCTC    |
| <i>tbx2/3</i>         | F                       | ACAGCGTTAGACTGCCACCTGTGGTC   |
|                       | R                       | CGCTAAGATGTGTGTTGAACGACTTC   |
| <i>foxd</i>           | F                       | ACACACACGCGCACATCCGTACATC    |
|                       | R                       | CCGTTTCGTAAGTCCTGCAAAAGTTGTC |
| <i>pax6</i>           | F                       | CGCCTTCTGAACGGCCAGACAT       |
|                       | R                       | TTGCGATGAGTGGGTGTCTGCC       |
| <i>onecut</i>         | F                       | GAGCAATGTGAGCGGTAGTTTTAC     |
|                       | R                       | GCATGTGGCCAGTCGAATTATAAC     |

F: forward; R: reverse.

**Table. S2. List of genes used in the phylogenetic analyses.**

| <b>Gene</b>  | <b>Species</b>                       | <b>Accession Number</b> | <b>Abbreviation in figures</b> |
|--------------|--------------------------------------|-------------------------|--------------------------------|
| <i>Gsc</i>   | <i>Ciona intestinalis</i>            | BAE06479.1              | CiGsc                          |
| <i>Gsc</i>   | <i>Danio rerio</i>                   | AAH81381.1              | DrGsc                          |
| <i>Gsc</i>   | <i>Branchiostoma floridae</i>        | AAF97935.1              | BfGsc                          |
| <i>Gsc</i>   | <i>Strongylocentrotus purpuratus</i> | NP_999663.1             | SpGsc                          |
| <i>Gsc</i>   | <i>Gallus gallus</i>                 | NP_990662.1             | GgGsc                          |
| <i>Gsc</i>   | <i>Xenopus laevis</i>                | XP_018087379.1          | XlGsc                          |
| <i>Gsc</i>   | <i>Homo sapiens</i>                  | EAW81594.1              | HsGsc                          |
| <i>Gsc</i>   | <i>Mus musculus</i>                  | EDL18791.1              | MmGsc                          |
| <i>Gsc</i>   | <i>Drosophila melanogaster</i>       | AAB17948.1              | DmGsc                          |
| <i>Gsc</i>   | <i>Lingula anatina</i>               | XP_013379052.1          | LaGsc                          |
| <i>Gsc</i>   | <i>Acropora digitifera</i>           | BAQ19108.1              | AdGsc                          |
| <i>Gsc</i>   | <i>Saccoglossus kowalevskii</i>      | NP_001161560.1          | SkGsc                          |
| <i>Gsc</i>   | <i>Ptychodera flava</i>              | MH782152                | PfGsc                          |
| <i>Gsc2</i>  | <i>Mus musculus</i>                  | AAI25357.1              | MmGsc2                         |
| <i>Gsc2</i>  | <i>Xenopus laevis</i>                | XP_018099595.1          | XlGsc2                         |
| <i>Gsc2</i>  | <i>Gallus gallus</i>                 | XP_025011442.1          | GgGsc2                         |
| <i>Gsc2</i>  | <i>Homo sapiens</i>                  | NP_005306.1             | HsGsc2                         |
| <i>Gsc2</i>  | <i>Danio rerio</i>                   | XP_021332017.1          | DrGsc2                         |
| <i>FoxG1</i> | <i>Danio rerio</i>                   | AAH92710.1              | DrFoxG1                        |
| <i>FoxG1</i> | <i>Homo sapiens</i>                  | AAH50072.1              | HsFoxG1                        |
| <i>FoxG1</i> | <i>Xenopus tropicalis</i>            | NP_001116933.1          | XtFoxG1                        |
| <i>FoxG</i>  | <i>Branchiostoma floridae</i>        | AAC18392.1              | BfFoxG                         |
| <i>FoxG</i>  | <i>Saccoglossus kowalevskii</i>      | XP_002735197.2          | SkFoxG                         |
| <i>FoxG</i>  | <i>Strongylocentrotus purpuratus</i> | NP_001123284.1          | SpFoxG                         |
| <i>FoxG</i>  | <i>Ptychodera flava</i>              | MH782154                | PfFoxG                         |
| <i>Slp1</i>  | <i>Drosophila melanogaster</i>       | NP_476730.1             | DmSlp1                         |
| <i>Slp2</i>  | <i>Drosophila melanogaster</i>       | NP_476834.1             | DmSlp2                         |
| <i>FoxI1</i> | <i>Homo sapiens</i>                  | AAH29778.2              | HsFoxI1                        |
| <i>FoxI1</i> | <i>Mus musculus</i>                  | AAH07475.2              | MmFoxI1                        |
| <i>FoxI2</i> | <i>Homo sapiens</i>                  | NP_997309.2             | HsFoxI2                        |
| <i>FoxI2</i> | <i>Mus musculus</i>                  | AAH96623.1              | MmFoxI2                        |
| <i>FoxG1</i> | <i>Mus musculus</i>                  | NP_001153584.1          | MmFoxG1                        |
| <i>FoxG1</i> | <i>Gallus gallus</i>                 | NP_990524.1             | GgFoxG1                        |
| <i>Pax1</i>  | <i>Mus musculus</i>                  | AAK01146.1              | MmPax1                         |
| <i>Pax4</i>  | <i>Mus musculus</i>                  | BAA24517.1              | MmPax4                         |
| <i>Pax6</i>  | <i>Mus musculus</i>                  | AAH36957.1              | MmPax6                         |
| <i>Pax9</i>  | <i>Mus musculus</i>                  | NP_035171.1             | MmPax9                         |
| <i>Pax1</i>  | <i>Xenopus laevis</i>                | ABG57077.1              | XlPax1                         |
| <i>Pax4</i>  | <i>Xenopus laevis</i>                | XP_017948145.1          | XlPax4                         |

|               |                                      |                |               |
|---------------|--------------------------------------|----------------|---------------|
| <i>Pax6</i>   | <i>Xenopus laevis</i>                | AAB36683.1     | XIPax6        |
| <i>Pax9</i>   | <i>Xenopus laevis</i>                | NP_001167485.1 | XIPax9        |
| <i>Pax1</i>   | <i>Branchiostoma floridae</i>        | XP_002210646.1 | BfPax1        |
| <i>Pax6</i>   | <i>Branchiostoma floridae</i>        | CAA11368.1     | BfPax6        |
| <i>Pax1</i>   | <i>Strongylocentrotus purpuratus</i> | SPU_006683.1   | SpPax1        |
| <i>Pax6</i>   | <i>Strongylocentrotus purpuratus</i> | SPU_006786.1   | SpPax6        |
| <i>Pax1</i>   | <i>Ptychodera flava</i>              | BAA78380.1     | PfPax1        |
| <i>Pax6</i>   | <i>Ptychodera flava</i>              | MH782156       | PfPax6        |
| <i>Pax1</i>   | <i>Saccoglossus kowalevskii</i>      | NP_001158408.1 | SkPax1        |
| <i>Pax6</i>   | <i>Saccoglossus kowalevskii</i>      | NP_001158383.1 | SkPax6        |
| <i>Pax1</i>   | <i>Homo sapiens</i>                  | NP_006183.2    | HsPax1        |
| <i>Pax4</i>   | <i>Homo sapiens</i>                  | NP_006184.2    | HsPax4        |
| <i>Pax6</i>   | <i>Homo sapiens</i>                  | NP_001121084.1 | HsPax6        |
| <i>Pax9</i>   | <i>Homo sapiens</i>                  | NP_006185.1    | HsPax9        |
| <i>Nkx2.2</i> | <i>Mus musculus</i>                  | AAI38160.1     | MmNkx2.2      |
| <i>Nkx2.8</i> | <i>Mus musculus</i>                  | NP_032727.2    | MmNkx2.8      |
| <i>Nkx2.2</i> | <i>Homo sapiens</i>                  | NP_002500.1    | HsNkx2.2      |
| <i>Nkx2.8</i> | <i>Homo sapiens</i>                  | NP_055175.2    | HsNkx2.8      |
| <i>Nkx2.2</i> | <i>Gallus gallus</i>                 | NP_001264647.1 | GgNkx2.2      |
| <i>Nkx2.8</i> | <i>Gallus gallus</i>                 | XP_003641408.3 | GgNkx2.8      |
| <i>Nkx2.2</i> | <i>Xenopus tropicalis</i>            | XP_002939477.1 | XtNkx2.2      |
| <i>Nkx2.8</i> | <i>Xenopus tropicalis</i>            | NP_988951.1    | XtNkx2.8      |
| <i>Nkx2.2</i> | <i>Branchiostoma floridae</i>        | XP_002589199.1 | BfNkx2.2      |
| <i>Nkx2.2</i> | <i>Saccoglossus kowalevskii</i>      | NP_001158404.1 | SkNkx2.2      |
| <i>Nkx2.2</i> | <i>Strongylocentrotus purpuratus</i> | AAS58444.1     | SpNkx2.2      |
| <i>Nkx2.2</i> | <i>Platynereis dumerilii</i>         | ABO93209.1     | PdNkx2.2      |
| <i>vnd</i>    | <i>Drosophila melanogaster</i>       | CAA60619.1     | DmNkx2.2(vnd) |
| <i>Nkx2.2</i> | <i>Ciona intestinalis</i>            | NP_001071957.1 | CiNkx2.2      |
| <i>Nkx2.1</i> | <i>Ciona intestinalis</i>            | NP_001027667.1 | CiNkx2.1      |
| <i>Nkx2.1</i> | <i>Mus musculus</i>                  | AAH57607.1     | MmNkx2.1      |
| <i>Nkx2.1</i> | <i>Homo sapiens</i>                  | NP_001073136.1 | HsNkx2.1      |
| <i>Nkx2.1</i> | <i>Gallus gallus</i>                 | CAA11493.1     | GgNkx2.1      |
| <i>Nkx2.1</i> | <i>Xenopus laevis</i>                | AAG17405.1     | XINkx2.1      |
| <i>Nkx2.1</i> | <i>Branchiostoma floridae</i>        | AAC35350.1     | BfNkx2.1      |
| <i>Nkx2.4</i> | <i>Homo sapiens</i>                  | NP_149416.1    | HsNkx2.4      |
| <i>Nkx2.4</i> | <i>Gallus gallus</i>                 | XP_015138916.1 | GgNkx2.4      |
| <i>Nkx2.4</i> | <i>Mus musculus</i>                  | NP_075993.1    | MmNkx2.4      |
| <i>Nkx2.4</i> | <i>Xenopus laevis</i>                | AAI69924.1     | XINkx2.4      |
| <i>Nkx2.1</i> | <i>Ptychodera flava</i>              | AAM93268.1     | PfNkx2.1      |
| <i>Nkx2.2</i> | <i>Ptychodera flava</i>              | MH782155       | PfNkx2.2      |
| <i>Onecut</i> | <i>Mus musculus</i>                  | NP_032288.1    | MmOnecut      |
| <i>Onecut</i> | <i>Ciona intestinalis</i>            | NP_001071994.1 | CiOnecut      |

|                 |                                      |                |                  |
|-----------------|--------------------------------------|----------------|------------------|
| <i>Onecut</i>   | <i>Saccoglossus kowalevskii</i>      | NP_001161619.1 | SkOnecut         |
| <i>Onecut</i>   | <i>Drosophila melanogaster</i>       | NP_524842.2    | DmOnecut         |
| <i>Onecut</i>   | <i>Platynereis dumerilii</i>         | AHI16250.1     | PdOnecut         |
| <i>Onecut</i>   | <i>Danio rerio</i>                   | AAL02365.1     | DrOnecut         |
| <i>Onecut</i>   | <i>Strongylocentrotus purpuratus</i> | AAR28054.1     | SpOnecut         |
| <i>Onecut</i>   | <i>Gallus gallus</i>                 | XP_015147374.1 | GgOnecut         |
| <i>Onecut</i>   | <i>Xenopus tropicalis</i>            | NP_001093730.1 | XtOnecut         |
| <i>Onecut</i>   | <i>Homo sapiens</i>                  | NP_004489.1    | HsOnecut         |
| <i>Onecut</i>   | <i>Ptychodera flava</i>              | MH782157       | PfOnecut         |
| <i>Onecut</i>   | <i>Branchiostoma floridae</i>        | MK679618       | BfOnecut         |
| <i>Onecut2</i>  | <i>Mus musculus</i>                  | AAI03669.1     | MmOnecut2        |
| <i>Onecut2</i>  | <i>Homo sapiens</i>                  | NP_004843.2    | HsOnecut2        |
| <i>Onecut2</i>  | <i>Xenopus tropicalis</i>            | XP_004910425.1 | XtOnecut2        |
| <i>Onecut2</i>  | <i>Danio rerio</i>                   | XP_001920308.3 | DrOnecut2        |
| <i>Onecut2</i>  | <i>Gallus gallus</i>                 | XP_003642951.1 | GgOnecut2        |
| <i>Cux</i>      | <i>Mus musculus</i>                  | CAA52922.1     | MmCux            |
| <i>Cux2</i>     | <i>Mus musculus</i>                  | NP_001299837.1 | MmCux2           |
| <i>Cux</i>      | <i>Drosophila melanogaster</i>       | NP_524764.1    | DmCux            |
| <i>Cux</i>      | <i>Strongylocentrotus purpuratus</i> | XP_011671723.1 | SpCux            |
| <i>Hnf6</i>     | <i>Danio rerio</i>                   | XP_694209.1    | DrOnecut3a(Hnf6) |
| <i>Onecut3b</i> | <i>Danio rerio</i>                   | XP_017207968.2 | DrOnecut3b       |
| <i>Onecut3</i>  | <i>Xenopus tropicalis</i>            | XP_002938867.1 | XtOnecut3        |
| <i>Hnf6</i>     | <i>Gallus gallus</i>                 | XP_003642905.1 | GgOnecut3(Hnf6)  |
| <i>Onecut3</i>  | <i>Homo sapiens</i>                  | NP_001073957.1 | HsOnecut3        |
| <i>Onecut3</i>  | <i>Mus musculus</i>                  | AAL86921.1     | MmOnecut3        |
| <i>Tbx2</i>     | <i>Danio rerio</i>                   | AAF59835.1     | DrTbx2           |
| <i>Tbx2</i>     | <i>Gallus gallus</i>                 | XP_001235321.4 | GgTbx2           |
| <i>Tbx2</i>     | <i>Xenopus laevis</i>                | BAA93081.1     | XITbx2           |
| <i>Tbx2</i>     | <i>Homo sapiens</i>                  | AAA73861.1     | HsTbx2           |
| <i>Tbx2</i>     | <i>Mus musculus</i>                  | AAC52697.1     | MmTbx2           |
| <i>Tbx3</i>     | <i>Gallus gallus</i>                 | NP_001257807.1 | GgTbx3           |
| <i>Tbx3</i>     | <i>Xenopus laevis</i>                | AAH77254.1     | XITbx3           |
| <i>Tbx3</i>     | <i>Homo sapiens</i>                  | AAD50989.2     | HsTbx3           |
| <i>Tbx3</i>     | <i>Mus musculus</i>                  | AAH96551.1     | MmTbx3           |
| <i>Tbx3</i>     | <i>Danio rerio</i>                   | NP_001095140.2 | DrTbx3           |
| <i>Tbx2/3</i>   | <i>Ciona intestinalis</i>            | NP_001027620.1 | CiTbx2/3         |
| <i>Tbx2/3</i>   | <i>Ptychodera flava</i>              | MH782153       | PfTbx2/3         |
| <i>Tbx2/3</i>   | <i>Branchiostoma floridae</i>        | XP_002598922.1 | BfTbx2/3         |
| <i>Tbx2/3</i>   | <i>Strongylocentrotus purpuratus</i> | NP_001123280.1 | SpTbx2/3         |
| <i>Tbx2/3</i>   | <i>Saccoglossus kowalevskii</i>      | NP_001158392.1 | SkTbx2/3         |
| <i>Tbx4/5</i>   | <i>Branchiostoma floridae</i>        | ABU50779.1     | BfTbx4/5         |
| <i>Tbx4</i>     | <i>Gallus gallus</i>                 | NP_001025708.1 | GgTbx4           |

|             |                                      |                |        |
|-------------|--------------------------------------|----------------|--------|
| <i>Tbx5</i> | <i>Gallus gallus</i>                 | NP_989504.1    | GgTbx5 |
| <i>Tbx4</i> | <i>Mus musculus</i>                  | NP_035666.2    | MmTbx4 |
| <i>Tbx5</i> | <i>Mus musculus</i>                  | NP_035667.1    | MmTbx5 |
| <i>Rx</i>   | <i>Strongylocentrotus purpuratus</i> | XP_003726050.1 | SpRx   |
| <i>Rx</i>   | <i>Drosophila melanogaster</i>       | NP_726006.3    | DmRx   |
| <i>Rx</i>   | <i>Mus musculus</i>                  | NP_038861      | MmRx   |
| <i>Rx</i>   | <i>Branchiostoma floridae</i>        | AFQ55891       | BfRx   |
| <i>Rx</i>   | <i>Saccoglossus kowalevskii</i>      | NP_001158375   | SkRx   |
| <i>Rx</i>   | <i>Homo sapiens</i>                  | AAH51901       | HsRx   |



## References

1. C. Y. Lin, C. H. Tung, J. K. Yu, Y. H. Su, Reproductive periodicity, spawning induction, and larval metamorphosis of the hemichordate acorn worm *Ptychodera flava*. *J. Exp. Zool. B Mol. Dev. Evol.* **326**, 47-60 (2016).
2. L. W. Yong, I. Kozmikova, J. K. Yu, Using *Amphioxus* as a Basal Chordate Model to Study BMP Signaling Pathway. *Methods Mol Biol* **1891**, 91-114 (2019).
3. A. Saudemont, *et al.*, Ancestral regulatory circuits governing ectoderm patterning downstream of Nodal and BMP2/4 revealed by gene regulatory network analysis in an echinoderm. *PLoS Genet.* **6**, e1001259 (2010).
4. Y. H. Su, *et al.*, A perturbation model of the gene regulatory network for oral and aboral ectoderm specification in the sea urchin embryo. *Dev. Biol.* **329**, 410-421 (2009).
